# Supplementary material for: Racial and Ethnic Discrimination and Hypertension by Educational Attainment Among a Cohort of US Women
Source: PubMed Central journal article supplement (PMC10665977; doi:10.1001/jamanetworkopen.2023.44707), 2023-11-22
Supplement: jamanetwopen-e2344707-s001.pdf [file jamanetwopen-e2344707-s001.pdf]

## Supplemental Online Content

Gaston SA, Forde AT, Green M, Sandler DP, Jackson CL. Racial and ethnic discrimination and hypertension by educational attainment among a cohort of US women. *JAMA Netw Open*. 2023;6(11):e2344707.  
doi:10.1001/jamanetworkopen.2023.44707

**eFigure 1.** Flow Chart of Incidence Density Sampling Pool Creation

**eFigure 2.** Directed Acyclic Graph

**eTable 1.** Comparison of Ineligible Non-Hispanic White, Non-Hispanic Black or African American, and Hispanic or Latina Participants Without Prior Hypertension Diagnosis to Eligible Controls, Sister Study

**eTable 2.** Case and Control Characteristics Among Non-Hispanic Black or African American Women, Overall and by Educational Attainment, Sister Study

**eTable 3.** Case and Control Characteristics Among Hispanic or Latina Women, Overall and by Educational Attainment, Sister Study

**eTable 4.** Case and Control Characteristics Among Non-Hispanic White Women, Overall and by Educational Attainment, Sister Study

**eTable 5.** Results of Conditional Logistic Regression: Odds Ratios for Associations Between Reports of Racial and Ethnic Discrimination and Hypertension Incidence, Overall and Stratified by Race and Ethnicity, Sister Study, 2003-2019

**eTable 6.** Results of Conditional Logistic Regression With Additional Adjustment for Potential Mediators: Odds Ratios for Associations Between Reports of Everyday Racial and Ethnic Discrimination and Hypertension Incidence Overall and Within Racial and Ethnic Groups, Stratified by Educational Attainment, Sister Study, 2003-2019

**eTable 7.** Results of Conditional Logistic Regression With Additional Adjustment for Potential Mediators: Odds Ratios for Associations Between Reports of Major Racial and Ethnic Discrimination and Hypertension Incidence Overall and Within Racial and Ethnic Groups, Stratified by Educational Attainment, Sister Study, 2003-2019

**eTable 8.** Results of Conditional Logistic Regression With Additional Adjustment for Potential Mediators: Odds Ratios for Associations Between Reports of Either Everyday or Major Racial and Ethnic Discrimination and Hypertension Incidence Overall and Within Racial and Ethnic Groups, Stratified by Educational Attainment, Sister Study, 2003-2019

**eTable 9.** Results of Conditional Logistic Regression With Additional Adjustment for Birthplace: Odds Ratios for Associations Between Reports of Everyday, Major, and

Either Everyday or Major Racial and Ethnic Discrimination and Hypertension Incidence Among Latina Women, Stratified by Educational Attainment, Sister Study, 2003-2019

This supplemental material has been provided by the authors to give readers additional information about their work.

**eFigure 1. Flow Chart of Incidence Density Sampling Pool Creation**

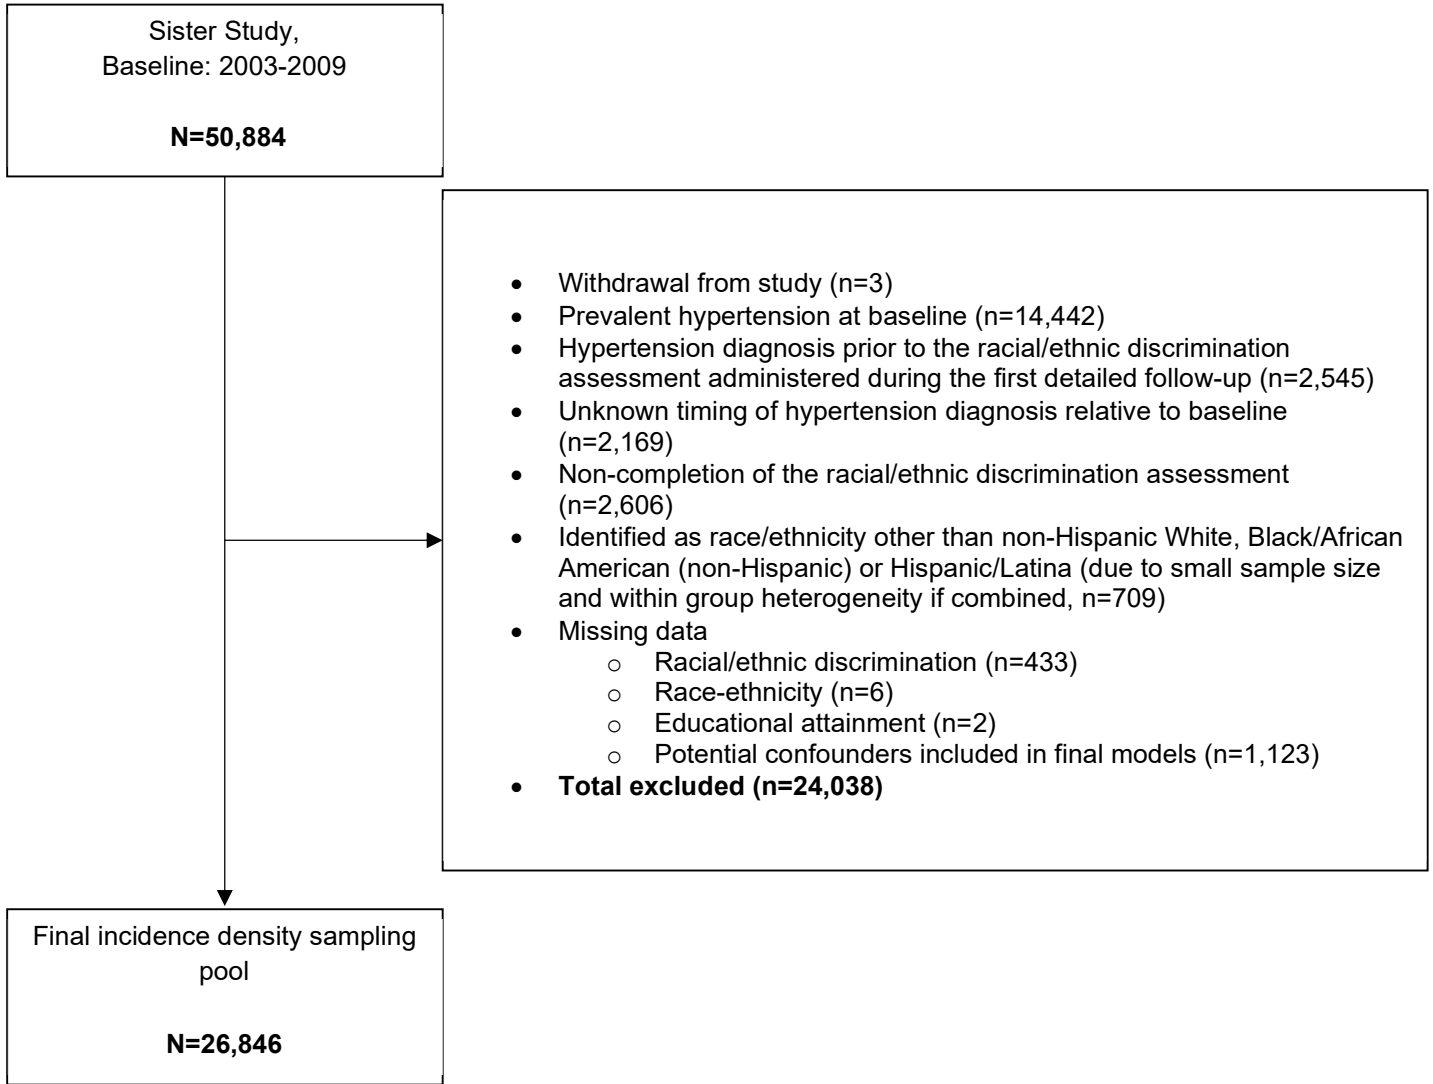

**eFigure 2. Directed Acyclic Graph**

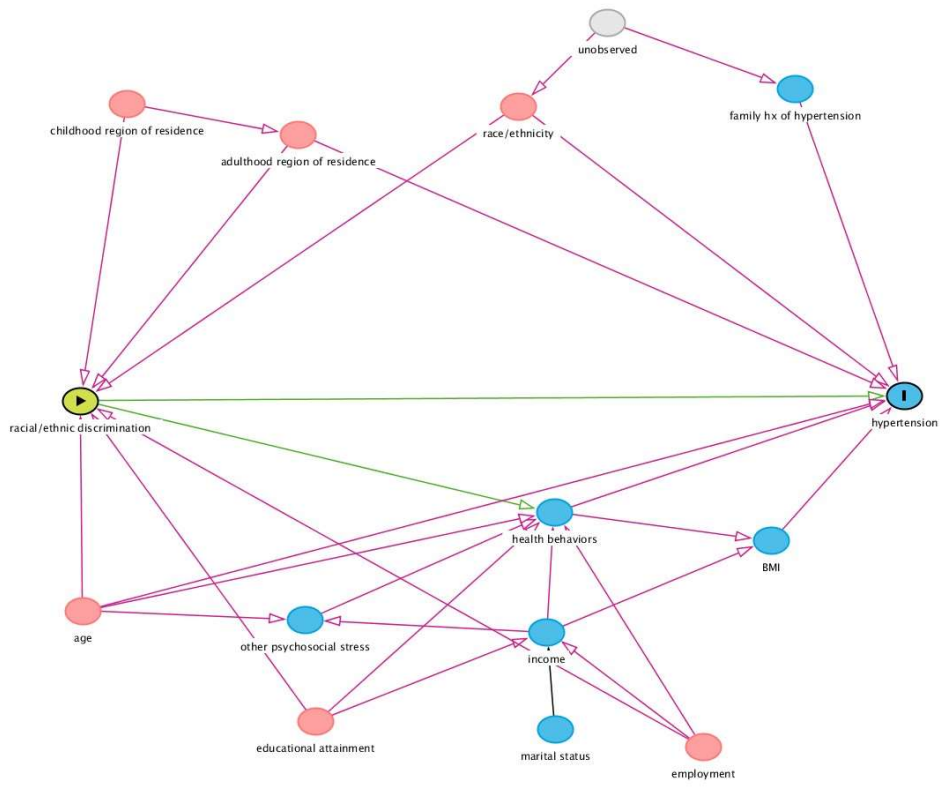

**eTable 1. Comparison of Ineligible Non-Hispanic White, Non-Hispanic Black or African American, and Hispanic or Latina Participants Without Prior Hypertension Diagnosis to Eligible Controls, Sister Study**

|                                                 | Eligible  |          |           | Ineligible |          |           |
|-------------------------------------------------|-----------|----------|-----------|------------|----------|-----------|
| N or n (%)                                      | 26,846    |          |           | 6,185      |          |           |
| Developed hypertension over follow-up, n        | 5,197     |          |           | 718        |          |           |
|                                                 | Mean or n | ±SD or % | % missing | Mean or n  | ±SD or % | % missing |
| <b>Sociodemographic Characteristics</b>         |           |          |           |            |          |           |
| Mean age ± SD, years *                          | 53.4      | ± 8.7    |           | 54.2       | ± 9.3    |           |
| Age Category *                                  |           |          |           |            |          |           |
| ≤55 years                                       | 16,040    | 59.7     |           | 3,457      | 55.9     |           |
| >55 years                                       | 10,806    | 40.3     |           | 2,728      | 44.1     |           |
| Birth Cohort *                                  |           |          |           |            |          |           |
| Silent Generation (1928-1945)                   | 5,955     | 22.2     |           | 1,646      | 26.6     |           |
| Baby Boomer (1946-1964)                         | 18,582    | 69.2     |           | 3,950      | 63.9     |           |
| Generation X (1965-1980)                        | 2,309     | 8.6      |           | 586        | 9.5      |           |
| Race/ethnicity *                                |           |          |           |            |          |           |
| non-Hispanic White                              | 24,370    | 90.8     |           | 4,961      | 80.2     |           |
| non-Hispanic Black/African American             | 1,335     | 5.0      |           | 763        | 12.3     |           |
| Hispanic/Latina                                 | 1,141     | 4.3      |           | 461        | 7.5      |           |
| Region of residence lived longest as an adult * |           |          |           |            |          | 0.4       |
| Northeast                                       | 5,270     | 19.6     |           | 1,148      | 18.6     |           |
| Midwest                                         | 7,716     | 28.7     |           | 1,591      | 25.7     |           |
| South                                           | 7,538     | 28.1     |           | 1,875      | 30.3     |           |
| West                                            | 5,841     | 21.8     |           | 1,323      | 21.4     |           |
| Puerto Rico or outside US and Puerto Rico       | 481       | 1.8      |           | 218        | 3.5      |           |
| Marital Status *                                |           |          | <0.01     |            |          | 0.1       |
| Married/living as married                       | 21,164    | 78.8     |           | 4,366      | 70.6     |           |
| Single/never married                            | 1,331     | 5.0      |           | 412        | 6.7      |           |
| Divorced/separated/widowed                      | 4,349     | 16.2     |           | 1,403      | 22.7     |           |
| Educational attainment *                        |           |          |           |            |          | 0.1       |
| ≤ High school                                   | 3,485     | 13.0     |           | 951        | 15.4     |           |
| Some college or technical degree                | 8,272     | 30.8     |           | 2,248      | 36.3     |           |
| ≥ College (Bachelor's or greater)               | 15,089    | 56.2     |           | 2,981      | 48.2     |           |
| Currently employed (yes) *                      | 18,897    | 70.4     |           | 3,831      | 61.9     | 5.3       |
| Annual household income *                       |           |          |           |            |          |           |
| Less than \$20,000                              | 777       | 2.9      |           | 368        | 5.9      |           |
| \$20,000 to \$49,999                            | 4,575     | 17.0     |           | 1,410      | 22.8     |           |
| \$50,000 to \$99,999                            | 11,022    | 41.1     |           | 2,466      | 39.9     |           |
| \$100,000 or more                               | 10,472    | 39.0     |           | 1,938      | 31.3     |           |
| <b>Health Behaviors</b>                         |           |          |           |            |          |           |
| Smoking Status *                                |           |          |           |            |          | 0.1       |

|                                                   | Eligible  |          |           | Ineligible |          |           |
|---------------------------------------------------|-----------|----------|-----------|------------|----------|-----------|
| N or n (%)                                        | 26,846    |          |           | 6,185      |          |           |
| Developed hypertension over follow-up, n          | 5,197     |          |           | 718        |          |           |
|                                                   | Mean or n | ±SD or % | % missing | Mean or n  | ±SD or % | % missing |
| Current                                           | 1,936     | 7.2      |           | 676        | 10.9     |           |
| Former                                            | 9,306     | 34.7     |           | 2,164      | 35.0     |           |
| Never                                             | 15,604    | 58.1     |           | 3,337      | 54.0     |           |
| Alcohol Consumption (past 12 months) *            |           |          |           |            |          | 0.8       |
| Current, ≥2 drinks/day                            | 1,269     | 4.7      |           | 307        | 5.0      |           |
| Current, <1 to <2 drinks/day                      | 21,470    | 80.0     |           | 4,587      | 74.2     |           |
| Never/Former                                      | 4,107     | 15.3     |           | 1,244      | 20.1     |           |
| Log-METs-hours/week ± SD *                        | 3.8       | ± 0.6    |           | 3.7        | ± 0.7    | 3.9       |
| Healthy Eating Index score ± SD *                 | 72.3      | ± 9.5    |           | 71.3       | ± 9.9    | 11.0      |
| Mean sleep score ± SD *                           | 1.0       | ± 1.2    |           | 1.2        | ± 1.3    | 4.7       |
| <b>Clinical Characteristics</b>                   |           |          |           |            |          |           |
| BMI category *                                    |           |          | <0.01     |            |          | 0.2       |
| Underweight (<18.5 kg/m <sup>2</sup> )            | 399       | 1.5      |           | 76         | 1.2      |           |
| Recommended weight (18.5-24.9 kg/m <sup>2</sup> ) | 12,818    | 47.7     |           | 2,134      | 34.5     |           |
| Overweight (25.0-29.9 kg/m <sup>2</sup> )         | 8,429     | 31.4     |           | 1,999      | 32.3     |           |
| Obesity (≥30.0 kg/m <sup>2</sup> )                | 5,193     | 19.3     |           | 1,966      | 31.8     |           |
| Postmenopausal (yes) *                            | 15,949    | 59.4     |           | 3,868      | 62.5     | 0.2       |

Data presented as % or mean ± SD. Percentages may not sum to 100 due to missing values and rounding.

Abbreviations: SD (standard deviation); US (United States); METs (metabolic equivalent of tasks); BMI (body mass index)

**Note:** Proportion employed is calculated as: number employed/(number employed + unemployed + homemaker + student + retired). Healthy Eating Index scores range from 0-100 with higher scores indicating a healthier diet. Sleep score is a summary score for 6 poor sleep dimensions. Sleep score ranges from 0-6. Participants were assigned a value of one for each if they reported experiencing the following: (1) habitual short [<7-hours] or long [>9-hours] sleep duration (vs. recommended [7-9-hours]); (2) inconsistent weekly sleep patterns, defined as inconsistent wake-up times and bedtimes during the prior six weeks (yes vs. no); (3) sleep debt, defined as ≥2-hour difference between average longest and shortest sleep duration (yes vs. no); (4) frequent napping (≥3 days/week versus <3 days/week); (5) difficulty falling asleep, defined as taking >30 minutes vs. ≤ 30 minutes to fall asleep on average; and (6) difficulty staying asleep, defined as waking up ≥3 times per night ≥3 nights/week vs. <3 times per night <3 nights/week.

\* Chi-Square or unpaired samples t-test two-sided p-value <0.05.

**eTable 2. Case and Control Characteristics Among Non-Hispanic Black or African American Women, Overall and by Educational Attainment, Sister Study**

|                                               | Total              |          |          |          | ≥ College          |          |          |          | Some College       |          |          |          | ≤ High School      |          |          |          |
|-----------------------------------------------|--------------------|----------|----------|----------|--------------------|----------|----------|----------|--------------------|----------|----------|----------|--------------------|----------|----------|----------|
|                                               | Hypertension Cases |          | Controls |          | Hypertension Cases |          | Controls |          | Hypertension Cases |          | Controls |          | Hypertension Cases |          | Controls |          |
| N or n (%)                                    | 338                |          | 3,380    |          | 204                |          | 2,106    |          | 106                |          | 1,025    |          | 28                 |          | 249      |          |
|                                               | mean               | ±SD or % | mean     | ±SD or % | mean               | ±SD or % | mean     | ±SD or % | mean               | ±SD or % | mean     | ±SD or % | mean               | ±SD or % | mean     | ±SD or % |
| <b>Sociodemographic Characteristics</b>       |                    |          |          |          |                    |          |          |          |                    |          |          |          |                    |          |          |          |
| Mean age ± SD, years                          | 51.0               | ± 7.9    | 52.2     | ± 7.8    | 51.4               | ± 8.     | 52.0     | ± 7.6    | 50.1               | ± 7.9    | 52.4     | ± 7.9    | 51.8               | ± 7.2    | 52.8     | ± 8.2    |
| Age Category                                  |                    |          |          |          |                    |          |          |          |                    |          |          |          |                    |          |          |          |
| ≤55 years                                     |                    | 72.8     |          | 65.9     |                    | 70.1     |          | 66.7     |                    | 77.4     |          | 64.3     |                    | 75.0     |          | 65.1     |
| >55 years                                     |                    | 27.2     |          | 34.1     |                    | 29.9     |          | 33.3     |                    | 22.6     |          | 35.7     |                    | 25.0     |          | 34.9     |
| Region of residence lived longest as an adult |                    |          |          |          |                    |          |          |          |                    |          |          |          |                    |          |          |          |
| Northeast                                     |                    | 12.1     |          | 13.6     |                    | 10.8     |          | 13.2     |                    | 9.4      |          | 12.8     |                    | 32.1     |          | 19.7     |
| Midwest                                       |                    | 23.4     |          | 23.7     |                    | 22.5     |          | 24.1     |                    | 24.5     |          | 23.5     |                    | 25.0     |          | 20.9     |
| South                                         |                    | 57.1     |          | 51.6     |                    | 57.4     |          | 51.0     |                    | 61.3     |          | 52.7     |                    | 39.3     |          | 52.2     |
| West                                          |                    | 6.8      |          | 10.2     |                    | 8.3      |          | 10.8     |                    | 4.7      |          | 10.1     |                    | 3.6      |          | 5.6      |
| Puerto Rico or outside US and Puerto Rico     |                    | 0.6      |          | 0.9      |                    | 1.0      |          | 0.9      |                    | 0.0      |          | 0.9      |                    | 0.0      |          | 1.6      |
| Marital Status                                |                    |          |          |          |                    |          |          |          |                    |          |          |          |                    |          |          |          |
| Married/living as married                     |                    | 54.1     |          | 58.2     |                    | 52.9     |          | 58.9     |                    | 60.4     |          | 58.2     |                    | 39.3     |          | 51.8     |
| Single/never married                          |                    | 14.5     |          | 12.7     |                    | 14.2     |          | 13.6     |                    | 16.0     |          | 11.6     |                    | 10.7     |          | 10.0     |
| Divorced/separated/widowed                    |                    | 31.4     |          | 29.0     |                    | 32.8     |          | 27.5     |                    | 23.6     |          | 29.9     |                    | 50.0     |          | 38.2     |
| Educational attainment                        |                    |          |          |          |                    |          |          |          |                    |          |          |          |                    |          |          |          |
| ≤ High school                                 |                    | 8.3      |          | 7.4      |                    | 0.0      |          | 0.0      |                    | 0.0      |          | 0.0      |                    | 100.0    |          | 100.0    |
| Some college or technical degree              |                    | 31.4     |          | 30.3     |                    | 0.0      |          | 0.0      |                    | 100.0    |          | 100.0    |                    | 0.0      |          | 0.0      |
| ≥ College (Bachelor's or greater)             |                    | 60.4     |          | 62.3     |                    | 100.0    |          | 100.0    |                    | 0.0      |          | 0.0      |                    | 0.0      |          | 0.0      |
| Currently employed (yes)                      |                    | 78.7     |          | 80.4     |                    | 80.4     |          | 84.4     |                    | 77.4     |          | 74.3     |                    | 71.4     |          | 71.9     |
| Annual household income                       |                    |          |          |          |                    |          |          |          |                    |          |          |          |                    |          |          |          |
| Less than \$20,000                            |                    | 2.7      |          | 4.5      |                    | 0.5      |          | 1.4      |                    | 4.7      |          | 7.9      |                    | 10.7     |          | 16.5     |
| \$20,000 to \$49,999                          |                    | 23.4     |          | 21.5     |                    | 15.7     |          | 14.9     |                    | 30.2     |          | 30.1     |                    | 53.6     |          | 41.8     |
| \$50,000 to \$99,999                          |                    | 44.1     |          | 41.6     |                    | 45.6     |          | 43.4     |                    | 44.3     |          | 40.4     |                    | 32.1     |          | 30.9     |

|                                                   | Total              |          |            |          | ≥ College          |          |            |          | Some College       |          |            |          | ≤ High School      |          |             |          |
|---------------------------------------------------|--------------------|----------|------------|----------|--------------------|----------|------------|----------|--------------------|----------|------------|----------|--------------------|----------|-------------|----------|
|                                                   | Hypertension Cases |          | Controls   |          | Hypertension Cases |          | Controls   |          | Hypertension Cases |          | Controls   |          | Hypertension Cases |          | Controls    |          |
|                                                   | 338                |          | 3,380      |          | 204                |          | 2,106      |          | 106                |          | 1,025      |          | 28                 |          | 249         |          |
| N or n (%)                                        | mean               | ±SD or % | mean       | ±SD or % | mean               | ±SD or % | mean       | ±SD or % | mean               | ±SD or % | mean       | ±SD or % | mean               | ±SD or % | mean        | ±SD or % |
| \$100,000 or more                                 |                    | 29.9     |            | 32.4     |                    | 38.2     |            | 40.2     |                    | 20.8     |            | 21.6     |                    | 3.6      |             | 10.8     |
| <b>Health Behaviors</b>                           |                    |          |            |          |                    |          |            |          |                    |          |            |          |                    |          |             |          |
| Smoking Status                                    |                    |          |            |          |                    |          |            |          |                    |          |            |          |                    |          |             |          |
| Current                                           |                    | 10.1     |            | 7.4      |                    | 8.3      |            | 5.4      |                    | 8.5      |            | 8.4      |                    | 28.6     |             | 19.7     |
| Former                                            |                    | 22.8     |            | 23.8     |                    | 20.6     |            | 22.1     |                    | 24.5     |            | 26.7     |                    | 32.1     |             | 26.1     |
| Never                                             |                    | 67.2     |            | 68.8     |                    | 71.1     |            | 72.5     |                    | 67.0     |            | 64.9     |                    | 39.3     |             | 54.2     |
| Alcohol Consumption (past 12 months)              |                    |          |            |          |                    |          |            |          |                    |          |            |          |                    |          |             |          |
| Current, ≥2 drinks/day                            |                    | 1.2      |            | 0.8      |                    | 0.5      |            | 0.4      |                    | 0.9      |            | 1.7      |                    | 7.1      |             | 0.4      |
| Current, <1 to <2 drinks/day                      |                    | 72.2     |            | 72.3     |                    | 72.1     |            | 75.1     |                    | 73.6     |            | 68.3     |                    | 67.9     |             | 64.7     |
| Never/Former                                      |                    | 26.6     |            | 27.0     |                    | 27.5     |            | 24.5     |                    | 25.5     |            | 30.0     |                    | 25.0     |             | 34.9     |
| Log-METs-hours/week ± SD                          | 3.6 ± 0.7          |          | 3.7 ± 0.7  |          | 3.6 ± 0.7          |          | 3.6 ± 0.7  |          | 3.7 ± 0.7          |          | 3.7 ± 0.6  |          | 3.6 ± 0.8          |          | 3.6 ± 0.7   |          |
| Healthy Eating Index score ± SD                   | 70.9 ± 9.8         |          | 72.0 ± 9.1 |          | 72.3 ± 9.6         |          | 72.9 ± 8.7 |          | 69.1 ± 9.7         |          | 70.9 ± 9.5 |          | 67.1 ± 9.5         |          | 69.1 ± 10.0 |          |
| Mean sleep score ± SD                             | 1.6 ± 1.3          |          | 1.5 ± 1.3  |          | 1.5 ± 1.2          |          | 1.3 ± 1.2  |          | 1.8 ± 1.4          |          | 1.6 ± 1.3  |          | 1.9 ± 1.5          |          | 2.3 ± 1.6   |          |
| <b>Clinical Characteristics</b>                   |                    |          |            |          |                    |          |            |          |                    |          |            |          |                    |          |             |          |
| BMI category                                      |                    |          |            |          |                    |          |            |          |                    |          |            |          |                    |          |             |          |
| Underweight (<18.5 kg/m <sup>2</sup> )            |                    | 0.6      |            | 0.8      |                    | 0.5      |            | 0.7      |                    | 0.9      |            | 1.2      |                    | 0.0      |             | 0.4      |
| Recommended weight (18.5-24.9 kg/m <sup>2</sup> ) |                    | 19.5     |            | 28.1     |                    | 23.5     |            | 30.3     |                    | 14.2     |            | 24.9     |                    | 10.7     |             | 22.9     |
| Overweight (25.0-29.9 kg/m <sup>2</sup> )         |                    | 33.7     |            | 36.5     |                    | 32.4     |            | 38.3     |                    | 35.8     |            | 32.3     |                    | 35.7     |             | 39.0     |
| Obesity (≥30.0 kg/m <sup>2</sup> )                |                    | 46.2     |            | 34.6     |                    | 43.6     |            | 30.7     |                    | 49.1     |            | 41.7     |                    | 53.6     |             | 37.8     |
| Postmenopausal (yes)                              |                    | 52.7     |            | 55.3     |                    | 51.0     |            | 52.6     |                    | 53.8     |            | 58.1     |                    | 60.7     |             | 66.7     |
| <b>Racial/ethnic Discrimination</b>               |                    |          |            |          |                    |          |            |          |                    |          |            |          |                    |          |             |          |
| Everyday racial/ethnic discrimination             |                    |          |            |          |                    |          |            |          |                    |          |            |          |                    |          |             |          |
| Yes                                               |                    | 76.3     |            | 74.0     |                    | 83.3     |            | 77.0     |                    | 66.0     |            | 73.5     |                    | 64.3     |             | 51.4     |
| No                                                |                    | 23.7     |            | 26.0     |                    | 16.7     |            | 23.0     |                    | 34.0     |            | 26.5     |                    | 35.7     |             | 48.6     |
| Major racial/ethnic discrimination                |                    |          |            |          |                    |          |            |          |                    |          |            |          |                    |          |             |          |



|                                                       | Total              |          |          |          | ≥ College          |          |          |          | Some College       |          |          |          | ≤ High School      |          |          |          |
|-------------------------------------------------------|--------------------|----------|----------|----------|--------------------|----------|----------|----------|--------------------|----------|----------|----------|--------------------|----------|----------|----------|
|                                                       | Hypertension Cases |          | Controls |          | Hypertension Cases |          | Controls |          | Hypertension Cases |          | Controls |          | Hypertension Cases |          | Controls |          |
| N or n (%)                                            | 338                |          | 3,380    |          | 204                |          | 2,106    |          | 106                |          | 1,025    |          | 28                 |          | 249      |          |
|                                                       | mean               | ±SD or % | mean     | ±SD or % | mean               | ±SD or % | mean     | ±SD or % | mean               | ±SD or % | mean     | ±SD or % | mean               | ±SD or % | mean     | ±SD or % |
| Yes                                                   |                    | 54.1     |          | 51.0     |                    | 59.3     |          | 55.6     |                    | 44.3     |          | 46.0     |                    | 53.6     |          | 67.1     |
| No                                                    |                    | 45.9     |          | 49.0     |                    | 40.7     |          | 44.4     |                    | 55.7     |          | 54.0     |                    | 46.4     |          | 32.9     |
| Either everyday or major racial/ethnic discrimination |                    |          |          |          |                    |          |          |          |                    |          |          |          |                    |          |          |          |
| Yes                                                   |                    | 82.5     |          | 79.2     |                    | 89.8     |          | 82.5     |                    | 71.7     |          | 78.3     |                    | 71.4     |          | 54.2     |
| No                                                    |                    | 17.5     |          | 20.8     |                    | 10.3     |          | 17.5     |                    | 28.3     |          | 21.7     |                    | 28.6     |          | 45.8     |

Data presented as % or mean ± SD. Percentages may not sum to 100 due to missing values and rounding.

Abbreviations: SD (standard deviation); US (United States); METs (metabolic equivalent of tasks); BMI (body mass index)

**Note:** Proportion employed is calculated as: number employed/(number employed + unemployed + homemaker + student + retired). Healthy Eating Index scores range from 0-100 with higher scores indicating a healthier diet. Sleep score is a summary score for 6 poor sleep dimensions. Sleep score ranges from 0-6. Participants were assigned a value of one for each if they reported experiencing the following: (1) habitual short [<7-hours] or long [>9-hours] sleep duration (vs. recommended [7-9-hours]); (2) inconsistent weekly sleep patterns, defined as inconsistent wake-up times and bedtimes during the prior six weeks (yes vs. no); (3) sleep debt, defined as ≥2-hour difference between average longest and shortest sleep duration; (4) frequent napping (≥3 days/week versus <3 days/week); (5) difficulty falling asleep, defined as taking >30 minutes vs. ≤ 30 minutes to fall asleep on average; and (6) difficulty staying asleep, defined as waking up ≥3 times per night ≥3 nights/week vs. <3 times per night <3 nights/week.

Missingness: <0.01% for marital status and BMI category

**eTable 3. Case and Control Characteristics Among Hispanic or Latina Women, Overall and by Educational Attainment, Sister Study**

|                                               | Total              |          | ≥ College          |          | Some College       |          | ≤ High School      |          |      |          |      |       |      |       |      |       |
|-----------------------------------------------|--------------------|----------|--------------------|----------|--------------------|----------|--------------------|----------|------|----------|------|-------|------|-------|------|-------|
|                                               | Hypertension Cases | Controls | Hypertension Cases | Controls | Hypertension Cases | Controls | Hypertension Cases | Controls |      |          |      |       |      |       |      |       |
| N or n                                        | 200                | 1,993    | 76                 | 967      | 87                 | 666      | 37                 | 360      |      |          |      |       |      |       |      |       |
|                                               | mean               | ±SD or % | mean               | ±SD or % | mean               | ±SD or % | mean               | ±SD or % | mean | ±SD or % |      |       |      |       |      |       |
| <b>Sociodemographic Characteristics</b>       |                    |          |                    |          |                    |          |                    |          |      |          |      |       |      |       |      |       |
| Mean age ± SD, years                          | 52.6               | ± 8.7    | 53.1               | ± 8.5    | 51.8               | ± 9.0    | 52.1               | ± 8.4    | 52.3 | ± 8.3    | 53.6 | ± 8.4 | 55.0 | ± 9.1 | 54.9 | ± 8.4 |
| Age Category                                  |                    |          |                    |          |                    |          |                    |          |      |          |      |       |      |       |      |       |
| ≤55 years                                     |                    | 63.0     |                    | 62.9     |                    | 61.8     |                    | 67.9     |      | 66.7     |      | 61.9  |      | 56.8  |      | 51.1  |
| >55 years                                     |                    | 37.0     |                    | 37.1     |                    | 38.2     |                    | 32.1     |      | 33.3     |      | 38.1  |      | 43.2  |      | 48.9  |
| Region of residence lived longest as an adult |                    |          |                    |          |                    |          |                    |          |      |          |      |       |      |       |      |       |
| Northeast                                     |                    | 10.0     |                    | 8.8      |                    | 10.5     |                    | 9.4      |      | 9.2      |      | 8.3   |      | 10.8  |      | 8.1   |
| Midwest                                       |                    | 8.0      |                    | 6.9      |                    | 6.6      |                    | 7.5      |      | 8.0      |      | 4.5   |      | 10.8  |      | 9.4   |
| South                                         |                    | 20.5     |                    | 25.6     |                    | 25.0     |                    | 26.6     |      | 18.4     |      | 26.9  |      | 16.2  |      | 20.8  |
| West                                          |                    | 23.0     |                    | 27.4     |                    | 15.8     |                    | 24.2     |      | 29.9     |      | 30.2  |      | 21.6  |      | 31.1  |
| Puerto Rico or outside US and Puerto Rico     |                    | 38.5     |                    | 31.3     |                    | 42.1     |                    | 32.3     |      | 34.5     |      | 30.2  |      | 40.5  |      | 30.6  |
| Marital Status                                |                    |          |                    |          |                    |          |                    |          |      |          |      |       |      |       |      |       |
| Married/living as married                     |                    | 66.0     |                    | 71.6     |                    | 67.1     |                    | 71.0     |      | 60.9     |      | 71.6  |      | 75.7  |      | 73.1  |
| Single/never married                          |                    | 5.0      |                    | 5.8      |                    | 9.2      |                    | 6.5      |      | 2.3      |      | 5.7   |      | 2.7   |      | 4.2   |
| Divorced/separated/widowed                    |                    | 29.0     |                    | 22.6     |                    | 23.7     |                    | 22.4     |      | 36.8     |      | 22.7  |      | 21.6  |      | 22.8  |
| Educational attainment                        |                    |          |                    |          |                    |          |                    |          |      |          |      |       |      |       |      |       |
| ≤ High school                                 |                    | 18.5     |                    | 18.1     |                    | 0.0      |                    | 0.0      |      | 0.0      |      | 0.0   |      | 100.0 |      | 100.0 |
| Some college or technical degree              |                    | 43.5     |                    | 33.4     |                    | 0.0      |                    | 0.0      |      | 100.0    |      | 100.0 |      | 0.0   |      | 0.0   |
| ≥ College (Bachelor's or greater)             |                    | 38.0     |                    | 48.5     |                    | 100.0    |                    | 100.0    |      | 0.0      |      | 0.0   |      | 0.0   |      | 0.0   |
| Currently employed (yes)                      |                    | 66.0     |                    | 64.9     |                    | 69.7     |                    | 70.9     |      | 69.0     |      | 64.3  |      | 51.4  |      | 50.0  |

|                                                   |            |            |            |            |             |            |             |            |  |  |  |
|---------------------------------------------------|------------|------------|------------|------------|-------------|------------|-------------|------------|--|--|--|
| Annual household income                           |            |            |            |            |             |            |             |            |  |  |  |
| Less than \$20,000                                | 20.0       | 12.1       | 10.5       | 6.2        | 19.5        | 12.5       | 40.5        | 27.2       |  |  |  |
| \$20,000 to \$49,999                              | 29.0       | 25.5       | 28.9       | 17.8       | 27.6        | 30.8       | 32.4        | 36.4       |  |  |  |
| \$50,000 to \$99,999                              | 33.0       | 36.8       | 31.6       | 39.2       | 39.1        | 38.1       | 21.6        | 28.1       |  |  |  |
| \$100,000 or more                                 | 18.0       | 25.6       | 28.9       | 36.8       | 13.8        | 18.6       | 5.4         | 8.3        |  |  |  |
| <b>Health Behaviors</b>                           |            |            |            |            |             |            |             |            |  |  |  |
| Smoking Status                                    |            |            |            |            |             |            |             |            |  |  |  |
| Current                                           | 6.0        | 5.8        | 6.6        | 3.9        | 3.4         | 2.7        | 10.8        | 7.8        |  |  |  |
| Former                                            | 29.5       | 24.7       | 22.4       | 22.6       | 67.8        | 74.2       | 43.2        | 23.6       |  |  |  |
| Never                                             | 64.5       | 69.5       | 71.1       | 73.4       | 28.7        | 23.1       | 45.9        | 68.6       |  |  |  |
| Alcohol Consumption (past 12 months)              |            |            |            |            |             |            |             |            |  |  |  |
| Current, ≥2 drinks/day                            | 1.5        | 1.7        | 0.0        | 0.5        | 3.4         | 2.7        | 0.0         | 2.8        |  |  |  |
| Current, <1 to <2 drinks/day                      | 68.5       | 74.8       | 76.3       | 79.8       | 67.8        | 74.2       | 54.1        | 62.2       |  |  |  |
| Never/Former                                      | 30.0       | 23.6       | 23.7       | 19.6       | 28.7        | 23.1       | 45.9        | 35.0       |  |  |  |
| Log-METs-hours/week ± SD                          | 3.7 ± 0.7  | 3.8 ± 0.7  | 3.7 ± 0.6  | 3.8 ± 0.6  | 3.7 ± 0.7   | 3.7 ± 0.7  | 3.7 ± 0.7   | 3.8 ± 0.7  |  |  |  |
| Healthy Eating Index score ± SD                   | 70.4 ± 9.8 | 71.1 ± 9.9 | 71.5 ± 8.9 | 72.3 ± 9.8 | 70.2 ± 10.4 | 70.1 ± 9.9 | 68.5 ± 10.3 | 69.9 ± 9.9 |  |  |  |
| Mean sleep score ± SD                             | 1.4 ± 1.4  | 1.3 ± 1.3  | 1.1 ± 1.3  | 1.2 ± 1.2  | 1.6 ± 1.5   | 1.4 ± 1.4  | 1.8 ± 1.2   | 1.6 ± 1.5  |  |  |  |
| <b>Clinical Characteristics</b>                   |            |            |            |            |             |            |             |            |  |  |  |
| BMI category                                      |            |            |            |            |             |            |             |            |  |  |  |
| Underweight (<18.5 kg/m <sup>2</sup> )            | 1.0        | 0.7        | 1.3        | 0.6        | 1.1         | 0.9        | 0.0         | 0.3        |  |  |  |
| Recommended weight (18.5-24.9 kg/m <sup>2</sup> ) | 25.5       | 40.5       | 28.9       | 46.8       | 26.4        | 36.9       | 16.2        | 30.3       |  |  |  |
| Overweight (25.0-29.9 kg/m <sup>2</sup> )         | 44.5       | 37.6       | 42.1       | 35.0       | 41.4        | 36.5       | 56.8        | 46.9       |  |  |  |
| Obesity (≥30.0 kg/m <sup>2</sup> )                | 29.0       | 21.2       | 27.6       | 17.6       | 31.0        | 25.7       | 27.0        | 22.5       |  |  |  |

|                                                       |      |      |      |      |      |      |      |      |
|-------------------------------------------------------|------|------|------|------|------|------|------|------|
| Postmenopausal (yes)                                  | 61.0 | 59.5 | 53.9 | 54.1 | 58.6 | 59.8 | 81.1 | 73.3 |
| <b>Racial/ethnic Discrimination</b>                   |      |      |      |      |      |      |      |      |
| Everyday racial/ethnic discrimination                 |      |      |      |      |      |      |      |      |
| Yes                                                   | 27.0 | 31.2 | 36.8 | 39.2 | 26.4 | 26.7 | 8.1  | 17.8 |
| No                                                    | 73.0 | 68.8 | 63.2 | 60.8 | 73.6 | 73.3 | 91.9 | 82.2 |
| Major racial/ethnic discrimination                    |      |      |      |      |      |      |      |      |
| Yes                                                   | 14.5 | 13.9 | 17.1 | 18.8 | 16.1 | 9.3  | 5.4  | 9.4  |
| No                                                    | 85.5 | 86.1 | 82.9 | 81.2 | 83.9 | 90.7 | 94.6 | 90.6 |
| Either everyday or major racial/ethnic discrimination |      |      |      |      |      |      |      |      |
| Yes                                                   | 30.0 | 34.3 | 38.2 | 42.1 | 29.9 | 29.4 | 13.5 | 22.5 |
| No                                                    | 70.0 | 65.7 | 61.8 | 57.9 | 70.1 | 70.6 | 86.5 | 77.5 |

Data presented as % or mean ± SD. Percentages may not sum to 100 due to missing values and rounding.

Abbreviations: SD (standard deviation); US (United States); METs (metabolic equivalent of tasks); BMI (body mass index)

**Note:** Proportion employed is calculated as: number employed/(number employed + unemployed + homemaker + student + retired). Healthy Eating Index scores range from 0-100 with higher scores indicating a healthier diet. Sleep score is a summary score for 6 poor sleep dimensions. Sleep score ranges from 0-6. Participants were assigned a value of one for each if they reported experiencing the following: (1) habitual short [<7-hours] or long [>9-hours] sleep duration (vs. recommended [7-9-hours]); (2) inconsistent weekly sleep patterns, defined as inconsistent wake-up times and bedtimes during the prior six weeks (yes vs. no); (3) sleep debt, defined as ≥2-hour difference between average longest and shortest sleep duration (yes vs. no); (4) frequent napping (≥3 days/week versus <3 days/week); (5) difficulty falling asleep, defined as taking >30 minutes vs. ≤ 30 minutes to fall asleep on average; and (6) difficulty staying asleep, defined as waking up ≥3 times per night ≥3 nights/week vs. <3 times per night <3 nights/week.

Missingness: <0.01% for marital status and BMI category

**eTable 4. Case and Control Characteristics Among Non-Hispanic White Women, Overall and by Educational Attainment, Sister Study**

|                                               | Total              |                  | ≥ College          |                  | Some College       |                  | ≤ High School      |                  |
|-----------------------------------------------|--------------------|------------------|--------------------|------------------|--------------------|------------------|--------------------|------------------|
|                                               | Hypertension Cases | Controls         | Hypertension Cases | Controls         | Hypertension Cases | Controls         | Hypertension Cases | Controls         |
| N or n                                        | 4,641              | 46,410           | 2,306              | 26,660           | 1,570              | 13,825           | 765                | 5,925            |
|                                               | mean ±SD<br>or %   | mean ±SD<br>or % | mean ±SD<br>or %   | mean ±SD<br>or % | mean ±SD<br>or %   | mean ±SD<br>or % | mean ±SD<br>or %   | mean ±SD<br>or % |
| <b>Sociodemographic Characteristics</b>       |                    |                  |                    |                  |                    |                  |                    |                  |
| Mean age ± SD, years                          | 55.6 ± 8.7         | 56.6 ± 8.5       | 55.6 ± 8.8         | 56.0 ± 8.4       | 55.1 ± 8.6         | 56.9 ± 8.4       | 58.0 ± 8.7         | 56.6 ± 8.7       |
| Age Category                                  |                    |                  |                    |                  |                    |                  |                    |                  |
| ≤55 years                                     | 49.6               | 45.3             | 48.8               | 47.2             | 53.1               | 44.8             | 44.7               | 38.4             |
| >55 years                                     | 50.4               | 54.7             | 51.2               | 52.8             | 46.9               | 55.2             | 55.3               | 61.6             |
| Region of residence lived longest as an adult |                    |                  |                    |                  |                    |                  |                    |                  |
| Northeast                                     | 18.9               | 20.7             | 20.7               | 21.7             | 16.0               | 18.2             | 19.3               | 21.7             |
| Midwest                                       | 32.0               | 29.4             | 29.4               | 26.5             | 34.1               | 32.7             | 35.9               | 35.2             |
| South                                         | 29.0               | 26.3             | 29.1               | 26.7             | 29.5               | 25.4             | 27.8               | 26.4             |
| West                                          | 19.8               | 23.2             | 20.6               | 24.6             | 20.3               | 23.5             | 16.6               | 16.5             |
| Puerto Rico or outside US and Puerto Rico     | 0.3                | 0.4              | 0.3                | 0.5              | 0.2                | 0.2              | 0.3                | 0.3              |
| Marital Status                                |                    |                  |                    |                  |                    |                  |                    |                  |
| Married/living as married                     | 78.0               | 79.1             | 75.9               | 77.9             | 78.0               | 79.9             | 84.2               | 82.9             |
| Single/never married                          | 4.7                | 3.9              | 6.5                | 5.3              | 3.5                | 2.2              | 1.8                | 1.6              |
| Divorced/separated/widowed                    | 17.3               | 16.9             | 17.6               | 16.8             | 18.5               | 17.9             | 14.0               | 15.5             |
| Educational attainment                        |                    |                  |                    |                  |                    |                  |                    |                  |
| ≤ High school                                 | 16.5               | 12.8             | 0.0                | 0.0              | 0.0                | 0.0              | 100.0              | 100.0            |
| Some college or technical degree              | 33.8               | 29.8             | 0.0                | 0.0              | 100.0              | 100.0            | 0.0                | 0.0              |
| ≥ College (Bachelor's or greater)             | 49.7               | 57.4             | 100.0              | 100.0            | 0.0                | 0.0              | 0.0                | 0.0              |
| Currently employed (yes)                      | 67.4               | 64.4             | 70.7               | 67.4             | 66.6               | 62.6             | 59.1               | 55.0             |

|                                                   |            |            |            |            |            |            |             |             |  |  |
|---------------------------------------------------|------------|------------|------------|------------|------------|------------|-------------|-------------|--|--|
| Annual household income                           |            |            |            |            |            |            |             |             |  |  |
| Less than \$20,000                                | 3.0        | 2.5        | 1.3        | 1.4        | 4.2        | 3.5        | 5.8         | 5.2         |  |  |
| \$20,000 to \$49,999                              | 21.1       | 17.9       | 13.5       | 11.8       | 25.6       | 23.2       | 35.0        | 33.3        |  |  |
| \$50,000 to \$99,999                              | 43.5       | 41.3       | 41.8       | 38.5       | 45.6       | 45.4       | 44.2        | 44.5        |  |  |
| \$100,000 or more                                 | 32.4       | 38.2       | 43.4       | 48.3       | 24.6       | 27.9       | 15.0        | 16.9        |  |  |
| <b>Health Behaviors</b>                           |            |            |            |            |            |            |             |             |  |  |
| Smoking Status                                    |            |            |            |            |            |            |             |             |  |  |
| Current                                           | 8.4        | 6.1        | 4.9        | 4.0        | 11.1       | 8.2        | 13.1        | 19.4        |  |  |
| Former                                            | 38.9       | 37.9       | 36.0       | 35.5       | 41.3       | 40.8       | 42.5        | 41.8        |  |  |
| Never                                             | 52.7       | 56.1       | 59.0       | 60.5       | 47.5       | 51.0       | 44.4        | 47.8        |  |  |
| Alcohol Consumption (past 12 months)              |            |            |            |            |            |            |             |             |  |  |
| Current, ≥2 drinks/day                            | 6.4        | 5.3        | 7.1        | 5.5        | 5.4        | 5.0        | 6.4         | 4.8         |  |  |
| Current, <1 to <2 drinks/day                      | 77.8       | 79.8       | 80.3       | 81.9       | 78.2       | 78.4       | 69.4        | 73.1        |  |  |
| Never/Former                                      | 15.8       | 15.0       | 12.6       | 12.5       | 16.4       | 16.6       | 24.2        | 22.1        |  |  |
| Log-METs-hours/week ± SD                          | 3.7 ± 0.6  | 3.8 ± 0.6  | 3.7 ± 0.6  | 3.8 ± 0.6  | 3.7 ± 0.7  | 3.8 ± 0.6  | 3.8 ± 0.6   | 3.8 ± 0.7   |  |  |
| Healthy Eating Index score ± SD                   | 71.4 ± 9.7 | 73.4 ± 9.3 | 73.1 ± 9.1 | 74.6 ± 8.8 | 70.0 ± 9.9 | 72.2 ± 9.7 | 69.1 ± 10.4 | 71.0 ± 10.1 |  |  |
| Mean sleep score ± SD                             | 1.1 ± 1.2  | 0.9 ± 1.2  | 0.9 ± 1.2  | 0.9 ± 1.1  | 1.1 ± 1.3  | 1.0 ± 1.2  | 1.2 ± 1.3   | 1.2 ± 1.2   |  |  |
| <b>Clinical Characteristics</b>                   |            |            |            |            |            |            |             |             |  |  |
| BMI category                                      |            |            |            |            |            |            |             |             |  |  |
| Underweight (<18.5 kg/m <sup>2</sup> )            | 0.9        | 1.5        | 1.0        | 1.7        | 0.8        | 1.3        | 0.8         | 1.3         |  |  |
| Recommended weight (18.5-24.9 kg/m <sup>2</sup> ) | 36.2       | 51.0       | 41.2       | 56.3       | 31.9       | 45.0       | 29.9        | 40.9        |  |  |
| Overweight (25.0-29.9 kg/m <sup>2</sup> )         | 35.5       | 30.8       | 32.7       | 28.2       | 37.6       | 33.3       | 39.5        | 36.8        |  |  |
| Obesity (≥30.0 kg/m <sup>2</sup> )                | 27.4       | 16.7       | 25.0       | 13.8       | 29.7       | 20.4       | 29.8        | 20.9        |  |  |
| Postmenopausal (yes)                              | 67.9       | 71.3       | 67.9       | 69.3       | 66.2       | 72.8       | 71.5        | 77.2        |  |  |
| <b>Racial/ethnic Discrimination</b>               |            |            |            |            |            |            |             |             |  |  |
| Everyday racial/ethnic discrimination             |            |            |            |            |            |            |             |             |  |  |
| Yes                                               | 4.1        | 3.6        | 4.6        | 4.1        | 4.1        | 3.2        | 2.4         | 2.1         |  |  |
| No                                                | 95.9       | 96.4       | 95.4       | 95.9       | 95.9       | 96.8       | 97.6        | 97.9        |  |  |
| Major racial/ethnic discrimination                |            |            |            |            |            |            |             |             |  |  |
| Yes                                               | 2.7        | 2.2        | 3.0        | 2.4        | 2.5        | 2.2        | 2.4         | 1.2         |  |  |
| No                                                | 97.3       | 97.8       | 97.0       | 97.6       | 97.5       | 97.8       | 97.6        | 98.8        |  |  |

|                                                       |      |      |      |      |      |      |      |      |  |
|-------------------------------------------------------|------|------|------|------|------|------|------|------|--|
| Either everyday or major racial/ethnic discrimination |      |      |      |      |      |      |      |      |  |
| Yes                                                   | 6.2  | 5.2  | 6.8  | 5.8  | 6.1  | 4.8  | 4.6  | 3.2  |  |
| No                                                    | 93.8 | 94.8 | 93.2 | 94.2 | 93.9 | 95.2 | 95.4 | 96.8 |  |

Data presented as % or mean ± SD. Percentages may not sum to 100 due to missing values and rounding.

Abbreviations: SD (standard deviation); US (United States); METs (metabolic equivalent of tasks); BMI (body mass index)

**Note:** Proportion employed is calculated as: number employed/(number employed + unemployed + homemaker + student + retired). Healthy Eating Index scores range from 0-100 with higher scores indicating a healthier diet. Sleep score is a summary score for 6 poor sleep dimensions. Sleep score ranges from 0-6. Participants were assigned a value of one for each if they reported experiencing the following: (1) habitual short [<7-hours] or long [>9-hours] sleep duration (vs. recommended [7-9-hours]); (2) inconsistent weekly sleep patterns, defined as inconsistent wake-up times and bedtimes during the prior six weeks (yes vs. no); (3) sleep debt, defined as ≥2-hour difference between average longest and shortest sleep duration (yes vs. no); (4) frequent napping (≥3 days/week versus <3 days/week); (5) difficulty falling asleep, defined as taking >30 minutes vs. ≤ 30 minutes to fall asleep on average; and (6) difficulty staying asleep, defined as waking up ≥3 times per night ≥3 nights/week vs. <3 times per night <3 nights/week.

Missingness: <0.01% for marital status and BMI category

**eTable 5. Results of Conditional Logistic Regression: Odds Ratios for Associations Between Reports of Racial and Ethnic Discrimination and Hypertension Incidence, Overall and Stratified by Race and Ethnicity, Sister Study, 2003-2019**

| <b>Racial/Ethnic Discrimination</b> | <b>n cases/</b> | <b>n controls</b> | <b>n cases/</b> | <b>n controls</b> | <b>OR</b>   | <b>95% CI</b>       |
|-------------------------------------|-----------------|-------------------|-----------------|-------------------|-------------|---------------------|
| <b>Everyday</b>                     | Yes             |                   | No              |                   |             |                     |
| Overall                             | 500/            | 4,803             | 4,679/          | 46,980            | 1.14        | (1.00, 1.29)        |
| Black/African American              | 258/            | 2,502             | 80/             | 878               | 1.23        | (0.95, 1.61)        |
| Latina                              | 54/             | 621               | 146/            | 1,372             | 0.87        | (0.63, 1.22)        |
| Non-Hispanic White                  | 188/            | 1,680             | 4,453/          | 44,730            | 1.17        | (1.00, 1.37)        |
| <b>Major</b>                        | Yes             |                   | No              |                   |             |                     |
| Overall                             | 339/            | 3,002             | 4,840/          | 48,781            | <b>1.29</b> | <b>(1.13, 1.48)</b> |
| Black/African American              | 183/            | 1,724             | 155/            | 1,656             | <b>1.29</b> | <b>(1.03, 1.61)</b> |
| Latina                              | 29/             | 278               | 171/            | 1,715             | 1.18        | (0.78, 1.79)        |
| Non-Hispanic White                  | 127/            | 1,000             | 4,514/          | 45,410            | <b>1.32</b> | <b>(1.09, 1.60)</b> |
| <b>Either</b>                       | Yes             |                   | No              |                   |             |                     |
| Overall                             | 626/            | 4,553             | 4,553/          | 46,024            | <b>1.22</b> | <b>(1.10, 1.36)</b> |
| Black/African American              | 279/            | 2,676             | 59/             | 704               | <b>1.40</b> | <b>(1.04, 1.88)</b> |
| Latina                              | 60/             | 684               | 140/            | 1309              | 0.87        | (0.63, 1.21)        |
| Non-Hispanic White                  | 287/            | 2,399             | 4,354/          | 44,011            | <b>1.26</b> | <b>(1.11, 1.43)</b> |

Abbreviations: OR (odds ratio); CI (confidence interval)

Models are adjusted for age in 5-year increments, race/ethnicity (in the overall population; Black/African American, Latina, non-Hispanic White), longest lived region of residence (Northeast, Midwest, South, West, Puerto Rico or outside the US and Puerto Rico), educational attainment (<high school, some college or technical degree, ≥college), and current employment (yes, no). Cases and controls were race/ethnicity- and age-matched.

Bolded values indicate statistical significance at a two-sided p-value of 0.05.

$P_{\text{race/ethnicity} \times \text{everyday racial/ethnic discrimination}} = 0.23$

$P_{\text{race/ethnicity} \times \text{major racial/ethnic discrimination}} = 0.89$

$P_{\text{race/ethnicity} \times \text{either form of racial/ethnic discrimination}} = 0.08$



**eTable 6. Results of Conditional Logistic Regression With Additional Adjustment for Potential Mediators: Odds Ratios for Associations Between Reports of Everyday Racial and Ethnic Discrimination and Hypertension Incidence Overall and Within Racial and Ethnic Groups, Stratified by Educational Attainment, Sister Study, 2003-2019**

|                                  | Everyday racial/ethnic discrimination (no) |            |             |                     |                  | Everyday racial/ethnic discrimination (yes) |            |             |                     |                  | OR (95% CI); <i>P</i> for everyday racial/ethnic discrimination within strata of educational attainment |                     |             |
|----------------------------------|--------------------------------------------|------------|-------------|---------------------|------------------|---------------------------------------------|------------|-------------|---------------------|------------------|---------------------------------------------------------------------------------------------------------|---------------------|-------------|
|                                  | n cases/                                   | n controls | OR          | 95% CI              | <i>P</i>         | n cases/                                    | n controls | OR          | 95% CI              | <i>P</i>         |                                                                                                         |                     |             |
| <b>Overall</b>                   |                                            |            |             |                     |                  |                                             |            |             |                     |                  |                                                                                                         |                     |             |
| ≥College                         | 2,283/                                     | 26,628     | 1.00        | reference           |                  | 303/                                        | 3,105      | <b>1.19</b> | <b>(1.03, 1.38)</b> | <b>0.02</b>      | 1.04                                                                                                    | (0.91, 1.20)        | 0.55        |
| Some college or technical degree | 1,605/                                     | 14,136     | <b>1.23</b> | <b>(1.14, 1.31)</b> | <b>&lt;0.001</b> | 158/                                        | 1,380      | <b>1.30</b> | <b>(1.07, 1.57)</b> | <b>&lt;0.001</b> | 0.93                                                                                                    | (0.77, 1.11)        | 0.40        |
| ≤ High school                    | 791/                                       | 6,216      | <b>1.33</b> | <b>(1.21, 1.46)</b> | <b>&lt;0.001</b> | 39/                                         | 318        | 1.29        | (0.91, 1.83)        | 0.15             | 0.87                                                                                                    | (0.62, 1.23)        | 0.44        |
| <b>Black/African American</b>    |                                            |            |             |                     |                  |                                             |            |             |                     |                  |                                                                                                         |                     |             |
| ≥College                         | 34/                                        | 485        | 1.00        | reference           |                  | 170/                                        | 1,621      | <b>1.53</b> | <b>(1.04, 2.26)</b> | <b>0.03</b>      | <b>1.53</b>                                                                                             | <b>(1.04, 2.26)</b> | <b>0.03</b> |
| Some college or technical degree | 36/                                        | 272        | <b>1.79</b> | <b>(1.08, 2.96)</b> | <b>0.02</b>      | 70/                                         | 753        | 1.31        | (0.85, 2.03)        | 0.22             | 0.73                                                                                                    | (0.47, 1.13)        | 0.16        |
| ≤ High school                    | 10/                                        | 121        | 1.02        | (0.47, 2.20)        | 0.96             | 18/                                         | 128        | <b>2.06</b> | <b>(1.09, 3.88)</b> | <b>0.03</b>      | 2.02                                                                                                    | (0.87, 4.67)        | 0.10        |
| <b>Latina</b>                    |                                            |            |             |                     |                  |                                             |            |             |                     |                  |                                                                                                         |                     |             |
| ≥College                         | 48/                                        | 588        | 1.00        | reference           |                  | 28/                                         | 379        | 0.94        | (0.57, 1.55)        | 0.81             | 0.94                                                                                                    | (0.57, 1.55)        | 0.81        |
| Some college or technical degree | 64/                                        | 488        | 1.47        | (0.97, 2.23)        | 0.07             | 23/                                         | 178        | 1.55        | (0.90, 2.67)        | 0.12             | 1.05                                                                                                    | (0.62, 1.77)        | 0.86        |
| ≤ High school                    | 34/                                        | 296        | 1.18        | (0.71, 1.96)        | 0.52             | 3/                                          | 64         | 0.50        | (0.15, 1.72)        | 0.27             | 0.43                                                                                                    | (0.12, 1.46)        | 0.17        |
| <b>Non-Hispanic White</b>        |                                            |            |             |                     |                  |                                             |            |             |                     |                  |                                                                                                         |                     |             |
| ≥College                         | 2,201/                                     | 27,756     | 1.00        | reference           |                  | 105/                                        | 1,105      | 1.10        | (0.89, 1.35)        | 0.37             | 1.10                                                                                                    | (0.89, 1.35)        | 0.37        |
| Some college or technical degree | 1,505/                                     | 13,376     | <b>1.21</b> | <b>(1.13, 1.30)</b> | <b>&lt;0.001</b> | 65/                                         | 449        | <b>1.54</b> | <b>(1.18, 2.01)</b> | <b>0.00</b>      | 1.27                                                                                                    | (0.97, 1.66)        | 0.08        |
| ≤ High school                    | 747/                                       | 5,799      | <b>1.35</b> | <b>(1.23, 1.48)</b> | <b>&lt;0.001</b> | 18/                                         | 126        | 1.38        | (0.84, 2.29)        | 0.20             | 1.03                                                                                                    | (0.62, 1.70)        | 0.91        |

Abbreviations: OR (odds ratio); CI (confidence interval); BAA (Black/African American); NHW (non-Hispanic White); RERI (relative excess risk due to interaction)

Models are adjusted for age in 5-year increments, race/ethnicity (in the overall population; Black/African American, Latina, non-Hispanic White), longest lived region of residence (Northeast, Midwest, South, West, Puerto Rico or outside the US and Puerto Rico), annual household income (<\$20,000, \$20,000-\$49,999, \$50,000-\$99,999, ≥\$100,000), smoking status (current, former, never), alcohol consumption (current, ≥2 drinks/day; current, <2 drinks/day; former/never), diet (2015 Healthy Eating Index score), physical activity (metabolic equivalent of tasks hours per week); and poor sleep score (sum of affirmative responses to short or long sleep duration, inconsistent weekly sleep patterns, ≥2 hour difference between shortest and longest sleep duration, napping ≥3 times/week, difficulty falling asleep, difficulty staying asleep). Cases and controls were race/ethnicity- and age-matched.

Note: Bolded values indicate statistical significance at a two-sided p-value=0.05.

Measures of effect modification on the additive scale in the overall population: RERI<sub>some college vs. college</sub> = -0.12 (95% CI:-0.39,0.15); RERI<sub>high school vs. college</sub> = -0.23 (95% CI:-0.70,0.24)

Measures of effect modification on the multiplicative scale in the overall population: ratio of ORs<sub>some college vs. college</sub> =0.89 (95% CI:0.72,1.10); ratio of ORs<sub>high school vs. college</sub> =0.84 (95% CI:0.58,1.21)

Measures of effect modification on the additive scale among BAA women: RERI<sub>some college vs. college</sub> = -1.01 (95% CI:-2.05,0.02); RERI<sub>high school vs. college</sub> = 0.51 (95% CI:-0.78,1.79)

Measures of effect modification on the multiplicative scale among BAA women: ratio of ORs<sub>some college vs. college</sub> =0.48 (95% CI:0.27,0.85); ratio of ORs<sub>high school vs. college</sub> =1.32 (95% CI:0.53,3.31)

Measures of effect modification on the additive scale among Latina women: RERI<sub>some college vs. college</sub> = 0.13 (95% CI:-0.78,1.05); RERI<sub>high school vs. college</sub> = -0.62 (95% CI:-1.58,0.34)

Measures of effect modification on the multiplicative scale among Latina women: ratio of ORs<sub>some college vs. college</sub> =1.12 (95% CI:0.54,2.29); ratio of ORs<sub>high school vs. college</sub> =0.45 (95% CI:0.12,1.71)

Measures of effect modification on the additive scale among NHW women: RERI<sub>some college vs. college</sub> = 0.23 (95% CI:-0.24,0.70); RERI<sub>high school vs. college</sub> = -0.06 (95% CI:-0.79,0.67)

Measures of effect modification on the multiplicative scale among NHW women: ratio of ORs<sub>some college vs. college</sub> =1.16 (95% CI:0.82,1.62); ratio of ORs<sub>high school vs. college</sub> =0.93 (95% CI:0.54,1.61)

**eTable 7. Results of Conditional Logistic Regression With Additional Adjustment for Potential Mediators: Odds Ratios for Associations Between Reports of Major Racial and Ethnic Discrimination and Hypertension Incidence Overall and Within Racial and Ethnic Groups, Stratified by Educational Attainment, Sister Study, 2003-2019**

|                                  | Major racial/ethnic discrimination (no) |            |             |                     |                  | Major racial/ethnic discrimination (yes) |            |             |                     |                  | OR (95% CI); <i>P</i> for major racial/ethnic discrimination within strata of educational attainment |                     |             |
|----------------------------------|-----------------------------------------|------------|-------------|---------------------|------------------|------------------------------------------|------------|-------------|---------------------|------------------|------------------------------------------------------------------------------------------------------|---------------------|-------------|
|                                  | n cases/                                | n controls | OR          | 95% CI              | <i>P</i>         | n cases/                                 | n controls | OR          | 95% CI              | <i>P</i>         |                                                                                                      |                     |             |
| <b>Overall</b>                   |                                         |            |             |                     |                  |                                          |            |             |                     |                  |                                                                                                      |                     |             |
| ≥College                         | 2,383/                                  | 27,752     | 1.00        | reference           |                  | 203/                                     | 1,981      | <b>1.30</b> | <b>(1.10, 1.54)</b> | <b>&lt;0.001</b> | 1.14                                                                                                 | (0.97, 1.33)        | 0.12        |
| Some college or technical degree | 1,662/                                  | 14,683     | <b>1.22</b> | <b>(1.14, 1.31)</b> | <b>&lt;0.001</b> | 101/                                     | 833        | <b>1.37</b> | <b>(1.10, 1.72)</b> | <b>0.01</b>      | 0.99                                                                                                 | (0.80, 1.23)        | 0.93        |
| ≤ High school                    | 795/                                    | 6,346      | <b>1.31</b> | <b>(1.20, 1.43)</b> | <b>&lt;0.001</b> | 35/                                      | 188        | <b>1.99</b> | <b>(1.36, 2.89)</b> | <b>&lt;0.001</b> | 1.37                                                                                                 | (0.94, 1.99)        | 0.10        |
| <b>Black/African American</b>    |                                         |            |             |                     |                  |                                          |            |             |                     |                  |                                                                                                      |                     |             |
| ≥College                         | 83/                                     | 935        | 1.00        | reference           |                  | 121/                                     | 1,171      | 1.29        | (0.95, 1.74)        | 0.10             | 1.29                                                                                                 | (0.95, 1.74)        | 0.10        |
| Some college or technical degree | 59/                                     | 554        | 1.20        | (0.84, 1.73)        | 0.32             | 47/                                      | 471        | 1.16        | (0.78, 1.71)        | 0.46             | 0.96                                                                                                 | (0.64, 1.45)        | 0.86        |
| ≤ High school                    | 13/                                     | 167        | 0.83        | (0.43, 1.58)        | 0.57             | 15/                                      | 82         | <b>2.25</b> | <b>(1.19, 4.24)</b> | <b>0.01</b>      | <b>2.71</b>                                                                                          | <b>(1.20, 6.13)</b> | <b>0.02</b> |
| <b>Latina</b>                    |                                         |            |             |                     |                  |                                          |            |             |                     |                  |                                                                                                      |                     |             |
| ≥College                         | 63/                                     | 785        | 1.00        | reference           |                  | 13/                                      | 182        | 0.95        | (0.50, 1.80)        | 0.88             | 0.95                                                                                                 | (0.50, 1.80)        | 0.88        |
| Some college or technical degree | 73/                                     | 604        | 1.40        | (0.97, 2.03)        | 0.07             | 14/                                      | 62         | <b>2.84</b> | <b>(1.44, 5.62)</b> | <b>&lt;0.001</b> | <b>2.03</b>                                                                                          | <b>(1.04, 3.95)</b> | <b>0.04</b> |
| ≤ High school                    | 35/                                     | 326        | 1.15        | (0.71, 1.87)        | 0.56             | 2/                                       | 34         | 0.55        | (0.12, 2.43)        | 0.43             | 0.48                                                                                                 | (0.11, 2.13)        | 0.33        |
| <b>Non-Hispanic White</b>        |                                         |            |             |                     |                  |                                          |            |             |                     |                  |                                                                                                      |                     |             |
| ≥College                         | 2,201/                                  | 25,555     | 1.00        | reference           |                  | 105/                                     | 1,105      | 1.25        | (0.96, 1.61)        | 0.09             | 1.25                                                                                                 | (0.96, 1.61)        | 0.09        |
| Some college or technical degree | 1,505/                                  | 13,376     | <b>1.22</b> | <b>(1.14, 1.31)</b> | <b>&lt;0.001</b> | 65/                                      | 449        | 1.36        | (0.97, 1.90)        | 0.07             | 1.11                                                                                                 | (0.79, 1.56)        | 0.53        |
| ≤ High school                    | 747/                                    | 5,799      | <b>1.34</b> | <b>(1.22, 1.47)</b> | <b>&lt;0.001</b> | 18/                                      | 126        | <b>2.53</b> | <b>(1.50, 4.28)</b> | <b>&lt;0.001</b> | <b>1.89</b>                                                                                          | <b>(1.12, 3.21)</b> | <b>0.02</b> |

Abbreviations: OR (odds ratio); CI (confidence interval); BAA (Black/African American); NHW (non-Hispanic White); RERI (relative excess risk due to interaction)

Models are adjusted for age in 5 year increments, race/ethnicity (in the overall population; Black/African American, Latina, non-Hispanic White), longest lived region of residence (Northeast, Midwest, South, West, Puerto Rico or outside the US and Puerto Rico), annual household income (<\$20,000, \$20,000-\$49,999, \$50,000-\$99,999, ≥\$100,000), smoking status (current, former, never), alcohol consumption (current, ≥2 drinks/day; current, <2 drinks/day; former/never), diet (2015 Healthy Eating Index score), physical activity (metabolic equivalent of tasks hours per week); and poor sleep score (sum of affirmative responses to short or long sleep duration, inconsistent weekly sleep patterns, ≥2 hour difference between shortest and longest sleep duration, napping ≥3 times/week, difficulty falling asleep, difficulty staying asleep). Cases and controls were race/ethnicity- and age-matched

Note: Bolded values indicate statistical significance at a two-sided p-value=0.05.

Measures of effect modification on the additive scale in the overall population: RERI<sub>some college vs. college</sub> = -0.16 (95% CI:-0.51,0.20); RERI<sub>high school vs. college</sub> = 0.37 (95% CI:-0.39,1.13)

Measures of effect modification on the multiplicative scale in the overall population: ratio of ORs<sub>some college vs. college</sub> =0.87 (95% CI:0.67,1.13); ratio of ORs<sub>high school vs. college</sub> =1.20 (95% CI:0.80,1.80)

Measures of effect modification on the additive scale among BAA women: RERI<sub>some college vs. college</sub> = -0.33 (95% CI:-0.96,0.29); RERI<sub>high school vs. college</sub> = 1.13 (95% CI:-0.28,2.54)

Measures of effect modification on the multiplicative scale among BAA women: ratio of ORs<sub>some college vs. college</sub> =0.75 (95% CI:0.45,1.24); ratio of ORs<sub>high school vs. college</sub> =2.10 (95% CI:0.88,5.03)

Measures of effect modification on the additive scale among Latina women: RERI<sub>some college vs. college</sub> = 1.49 (95% CI:-0.40,3.37); RERI<sub>high school vs. college</sub> = -0.56 (95% CI:-1.71,0.60)

Measures of effect modification on the multiplicative scale among Latina women: ratio of ORs<sub>some college vs. college</sub> =2.13 (95% CI:0.85,5.35); ratio of ORs<sub>high school vs. college</sub> =0.50 (95% CI:0.10,2.58)

Measures of effect modification on the additive scale among NHW women: RERI<sub>some college vs. college</sub> = -0.11 (95% CI:-0.66,0.45); RERI<sub>high school vs. college</sub> = 0.95 (95% CI:-0.42,2.31)

Measures of effect modification on the multiplicative scale among NHW women: ratio of ORs<sub>some college vs. college</sub> =0.89 (95% CI:0.59,1.36); ratio of ORs<sub>high school vs. college</sub> =1.52 (95% CI:0.85,2.74)

**eTable 8. Results of Conditional Logistic Regression With Additional Adjustment for Potential Mediators: Odds Ratios for Associations Between Reports of Either Everyday or Major Racial and Ethnic Discrimination and Hypertension Incidence Overall and Within Racial and Ethnic Groups, Stratified by Educational Attainment, Sister Study, 2003-2019**

|                                  | Either everyday or major racial/ethnic discrimination (no) |            |             |                     |                  | Either everyday or major racial/ethnic discrimination (yes) |            |             |                     |                  | OR (95% CI); <i>P</i> for major racial/ethnic discrimination within strata of educational attainment |                     |             |
|----------------------------------|------------------------------------------------------------|------------|-------------|---------------------|------------------|-------------------------------------------------------------|------------|-------------|---------------------|------------------|------------------------------------------------------------------------------------------------------|---------------------|-------------|
|                                  | n cases/                                                   | n controls | OR          | 95% CI              | <i>P</i>         | n cases/                                                    | n controls | OR          | 95% CI              | <i>P</i>         |                                                                                                      |                     |             |
| <b>Overall</b>                   |                                                            |            |             |                     |                  |                                                             |            |             |                     |                  |                                                                                                      |                     |             |
| ≥College                         | 2,218/                                                     | 26,045     | 1.00        | reference           |                  | 368/                                                        | 3,688      | <b>1.25</b> | <b>(1.09, 1.43)</b> | <b>&lt;0.001</b> | 1.10                                                                                                 | (0.97, 1.25)        | 0.14        |
| Some college or technical degree | 1,565/                                                     | 13,850     | <b>1.23</b> | <b>(1.15, 1.32)</b> | <b>&lt;0.001</b> | 198/                                                        | 1,666      | <b>1.38</b> | <b>(1.16, 1.63)</b> | <b>&lt;0.001</b> | 0.99                                                                                                 | (0.84, 1.16)        | 0.86        |
| ≤ High school                    | 770/                                                       | 6,129      | <b>1.32</b> | <b>(1.21, 1.45)</b> | <b>&lt;0.001</b> | 60/                                                         | 405        | <b>1.61</b> | <b>(1.21, 2.13)</b> | <b>&lt;0.001</b> | 1.10                                                                                                 | (0.83, 1.47)        | 0.51        |
| <b>Black/African American</b>    |                                                            |            |             |                     |                  |                                                             |            |             |                     |                  |                                                                                                      |                     |             |
| ≥College                         | 21/                                                        | 368        | 1.00        | reference           |                  | 183/                                                        | 1,738      | <b>1.95</b> | <b>(1.22, 3.12)</b> | <b>0.01</b>      | <b>1.95</b>                                                                                          | <b>(1.22, 3.12)</b> | <b>0.01</b> |
| Some college or technical degree | 30/                                                        | 222        | <b>2.32</b> | <b>(1.29, 4.20)</b> | <b>0.01</b>      | 76/                                                         | 76         | 1.67        | (1.00, 2.78)        | 0.05             | 0.72                                                                                                 | (0.45, 1.14)        | 0.16        |
| ≤ High school                    | 8/                                                         | 114        | 1.06        | (0.44, 2.56)        | 0.89             | 20/                                                         | 135        | <b>2.75</b> | <b>(1.40, 5.38)</b> | <b>&lt;0.001</b> | <b>2.59</b>                                                                                          | <b>(1.07, 6.26)</b> | <b>0.04</b> |
| <b>Latina</b>                    |                                                            |            |             |                     |                  |                                                             |            |             |                     |                  |                                                                                                      |                     |             |
| ≥College                         | 47/                                                        | 560        | 1.00        | reference           |                  | 29/                                                         | 407        | 0.91        | (0.55, 1.49)        | 0.70             | 0.91                                                                                                 | (0.55, 1.49)        | 0.70        |
| Some college or technical degree | 61/                                                        | 470        | 1.42        | (0.93, 2.17)        | 0.10             | 26/                                                         | 196        | 1.60        | (0.94, 2.72)        | 0.08             | 1.12                                                                                                 | (0.68, 1.87)        | 0.65        |
| ≤ High school                    | 32/                                                        | 279        | 1.18        | (0.70, 1.99)        | 0.53             | 5/                                                          | 81         | 0.61        | (0.23, 1.64)        | 0.33             | 0.52                                                                                                 | (0.19, 1.40)        | 0.19        |
| <b>Non-Hispanic White</b>        |                                                            |            |             |                     |                  |                                                             |            |             |                     |                  |                                                                                                      |                     |             |
| ≥College                         | 2,150/                                                     | 25,117     | 1.00        | reference           |                  | 156/                                                        | 1,543      | 1.17        | (0.99, 1.39)        | 0.07             | 1.17                                                                                                 | (0.99, 1.39)        | 0.07        |
| Some college or technical degree | 1,474/                                                     | 13,158     | <b>1.21</b> | <b>(1.13, 1.31)</b> | <b>&lt;0.001</b> | 96/                                                         | 96         | <b>1.53</b> | <b>(1.22, 1.91)</b> | <b>&lt;0.001</b> | <b>1.26</b>                                                                                          | <b>(1.01, 1.57)</b> | <b>0.04</b> |
| ≤ High school                    | 730/                                                       | 5,736      | <b>1.34</b> | <b>(1.22, 1.47)</b> | <b>&lt;0.001</b> | 35/                                                         | 189        | <b>1.87</b> | <b>(1.29, 2.70)</b> | <b>&lt;0.001</b> | 1.39                                                                                                 | (0.96, 2.02)        | 0.08        |

Abbreviations: OR (odds ratio); CI (confidence interval); BAA (Black/African American); NHW (non-Hispanic White); RERI (relative excess risk due to interaction)

Models are adjusted for age in 5 year increments, race/ethnicity (in the overall population; Black/African American, Latina, non-Hispanic White), longest lived region of residence (Northeast, Midwest, South, West, Puerto Rico or outside the US and Puerto Rico), annual household income (<\$20,000, \$20,000-\$49,999, \$50,000-\$99,999, ≥\$100,000), smoking status (current, former, never), alcohol consumption (current, ≥2 drinks/day; current, <2 drinks/day; former/never), diet (2015 Healthy Eating Index score), physical activity (metabolic equivalent of tasks hours per week); and poor sleep score (sum of affirmative responses to short or long sleep duration, inconsistent weekly sleep patterns, ≥2 hour difference between shortest and longest sleep duration, napping ≥3 times/week, difficulty falling asleep, difficulty staying asleep).

Note: Bolded values indicate statistical significance at a two-sided p-value=0.05.

Measures of effect modification on the additive scale in the overall population: RERI<sub>some college vs. college</sub> = -0.10 (95% CI:-0.36,0.16); RERI<sub>high school vs. college</sub> = 0.03 (95% CI:-0.44,0.50)

Measures of effect modification on the multiplicative scale in the overall population: ratio of ORs<sub>some college vs. college</sub> =0.90 (95% CI:0.74,1.09); ratio of ORs<sub>high school vs. college</sub> =1.00 (95% CI:0.74,1.36)

Measures of effect modification on the additive scale among BAA women: RERI<sub>some college vs. college</sub> = -1.61 (95% CI:-3.16,-0.05); RERI<sub>high school vs. college</sub> = 0.74 (95% CI:-0.85,2.33)

Measures of effect modification on the multiplicative scale among BAA women: ratio of ORs<sub>some college vs. college</sub> =0.37 (95% CI:0.19,0.71); ratio of ORs<sub>high school vs. college</sub> =1.33 (95% CI:0.49,3.60)

Measures of effect modification on the additive scale among Latina women:  $RERI_{\text{some college vs. college}} = 0.27$  (95% CI:-0.61,1.15);  $RERI_{\text{high school vs. college}} = -0.48$  (95% CI:-1.40,0.45)

Measures of effect modification on the multiplicative scale among Latina women: ratio of ORs  $_{\text{some college vs. college}} = 1.24$  (95% CI:0.62,2.50); ratio of ORs  $_{\text{high school vs. college}} = 0.57$  (95% CI:0.19,1.73)

Measures of effect modification on the additive scale among NHW women:  $RERI_{\text{some college vs. college}} = 0.14$  (95% CI:-0.25,0.53);  $RERI_{\text{high school vs. college}} = 0.35$  (95% CI:-0.36,1.07)

Measures of effect modification on the multiplicative scale among NHW women: ratio of ORs  $_{\text{some college vs. college}} = 1.07$  (95% CI:0.81,1.42); ratio of ORs  $_{\text{high school vs. college}} = 1.19$  (95% CI:0.79,1.79)

**eTable 9. Results of Conditional Logistic Regression With Additional Adjustment for Birthplace: Odds Ratios for Associations Between Reports of Everyday, Major, and Either Everyday or Major Racial and Ethnic Discrimination and Hypertension Incidence Among Latina Women, Stratified by Educational Attainment, Sister Study, 2003-2019**

| Latina Participants              |                                                                   |            |             |                     |             |                                                                    |            |             |                     |                  | OR (95% CI); <i>P</i> for everyday racial/ethnic discrimination within strata of educational attainment |                     |             |
|----------------------------------|-------------------------------------------------------------------|------------|-------------|---------------------|-------------|--------------------------------------------------------------------|------------|-------------|---------------------|------------------|---------------------------------------------------------------------------------------------------------|---------------------|-------------|
| Educational Attainment           | n cases/                                                          | n controls | OR          | 95% CI              | <i>P</i>    | n cases/                                                           | n controls | OR          | 95% CI              | <i>P</i>         |                                                                                                         |                     |             |
|                                  | <b>Everyday racial/ethnic discrimination (no)</b>                 |            |             |                     |             | <b>Everyday racial/ethnic discrimination (yes)</b>                 |            |             |                     |                  |                                                                                                         |                     |             |
| ≥College                         | 48/                                                               | 588        | 1.00        | reference           |             | 28/                                                                | 379        | 0.94        | (0.57, 1.55)        | 0.81             | 0.94                                                                                                    | (0.57, 1.55)        | 0.81        |
| Some college or technical degree | 64/                                                               | 488        | <b>1.68</b> | <b>(1.12, 2.51)</b> | <b>0.01</b> | 23/                                                                | 178        | <b>1.78</b> | <b>(1.05, 3.04)</b> | <b>0.03</b>      | 1.06                                                                                                    | (0.63, 1.78)        | 0.82        |
| ≤ High school                    | 34/                                                               | 296        | 1.53        | (0.95, 2.46)        | 0.08        | 3/                                                                 | 64         | 0.66        | (0.20, 2.20)        | 0.49             | 0.43                                                                                                    | (0.13, 1.46)        | 0.18        |
|                                  | <b>Major racial/ethnic discrimination (no)</b>                    |            |             |                     |             | <b>Major racial/ethnic discrimination (yes)</b>                    |            |             |                     |                  |                                                                                                         |                     |             |
| ≥College                         | 63/                                                               | 785        | 1.00        | reference           |             | 13/                                                                | 182        | 0.97        | (0.52, 1.83)        | 0.93             | 0.97                                                                                                    | (0.52, 1.83)        | 0.93        |
| Some college or technical degree | 73/                                                               | 604        | <b>1.58</b> | <b>(1.10, 2.26)</b> | <b>0.01</b> | 14/                                                                | 62         | <b>3.53</b> | <b>(1.83, 6.82)</b> | <b>&lt;0.001</b> | <b>2.23</b>                                                                                             | <b>(1.16, 4.30)</b> | <b>0.02</b> |
| ≤ High school                    | 35/                                                               | 326        | 1.47        | (0.93, 2.30)        | 0.10        | 2/                                                                 | 34         | 0.77        | (0.18, 3.32)        | 0.73             | 0.53                                                                                                    | (0.12, 2.31)        | 0.40        |
|                                  | <b>Either everyday or major racial/ethnic discrimination (no)</b> |            |             |                     |             | <b>Either everyday or major racial/ethnic discrimination (yes)</b> |            |             |                     |                  |                                                                                                         |                     |             |
| ≥College                         | 47/                                                               | 560        | 1.00        | reference           |             | 29/                                                                | 407        | 0.90        | (0.55, 1.48)        | 0.69             | 0.90                                                                                                    | (0.55, 1.48)        | 0.69        |
| Some college or technical degree | 61/                                                               | 470        | <b>1.62</b> | <b>(1.08, 2.44)</b> | <b>0.02</b> | 26/                                                                | 196        | <b>1.82</b> | <b>(1.09, 3.06)</b> | <b>0.02</b>      | 1.12                                                                                                    | (0.68, 1.86)        | 0.65        |
| ≤ High school                    | 32/                                                               | 279        | 1.52        | (0.93, 2.48)        | 0.10        | 5/                                                                 | 81         | 0.81        | (0.31, 2.11)        | 0.66             | 0.53                                                                                                    | (0.20, 1.42)        | 0.21        |

Abbreviations: OR (odds ratio); CI (confidence interval); RED (racial/ethnic discrimination)

Models are adjusted for age in 5-year increments, nativity/birthplace (US states, Puerto Rico or outside the US and Puerto Rico), longest lived region of residence (Northeast, Midwest, South, West, Puerto Rico or outside the US and Puerto Rico), and current employment (yes, no). Cases and controls were race/ethnicity- and age-matched.

Note: Bolded values indicate statistical significance at a two-sided p-value=0.05.

Everyday RED - Measures of effect modification on the additive scale: RERI<sub>some college vs. college</sub> = 0.16 (95% CI:-0.85,1.17); RERI<sub>high school vs. college</sub> = -0.81 (95% CI:-1.97,0.34)

Everyday RED- Measures of effect modification on the multiplicative scale: ratio of ORs<sub>some college vs. college</sub> =1.13 (95% CI:0.55,2.30); ratio of ORs<sub>high school vs. college</sub> =0.46 (95% CI:0.12,1.70)

Major RED - Measures of effect modification on the additive scale: RERI<sub>some college vs. college</sub> = 1.98 (95% CI:-0.28,4.23); RERI<sub>high school vs. college</sub> = -0.67 (95% CI:-2.10,0.77)

Major RED - Measures of effect modification on the multiplicative scale: ratio of ORs<sub>some college vs. college</sub> =2.30 (95% CI:0.93,5.69); ratio of ORs<sub>high school vs. college</sub> =0.54 (95% CI:0.11,2.74)

Everyday or major RED - Measures of effect modification on the additive scale: RERI<sub>some college vs. college</sub> = 0.30 (95% CI:-0.67,1.27); RERI<sub>high school vs. college</sub> = -0.62 (95% CI:-1.73,0.50)

Everyday or major RED - Measures of effect modification on the multiplicative scale: ratio of ORs<sub>some college vs. college</sub> =1.24 (95% CI:0.62,2.50); ratio of ORs<sub>high school vs. college</sub> =0.59 (95% CI:0.20,1.77)
