# Supplementary material for: Racial and Ethnic Discrimination and Hypertension by Educational Attainment Among a Cohort of US Women
Source: PubMed Central journal article supplement (PMC10665977; doi:10.1001/jamanetworkopen.2023.44707), 2023-11-22
Supplement: jamanetwopen-e2344707-s002.pdf [file jamanetwopen-e2344707-s002.pdf]

## Data Sharing Statement

Gaston. Racial and Ethnic Discrimination and Hypertension by Educational Attainment Among a Cohort of US Women. *JAMA Netw Open*. Published November 22, 2023.

doi:10.1001/jamanetworkopen.2023.44707

### Data

**Data available:** No

### Additional Information

**Explanation for why data not available:** Data, including anonymized data for replication, are available as described on the Sister Study website

(<https://sisterstudy.niehs.nih.gov/English/coll-data.htm>). Data use is restricted to replication, only. New analyses must be approved after a proposal process. Code can be requested from the corresponding author.
